# Supplementary material for: Therapeutic potential of Diosmin against benign prostatic hyperplasia via regulation of androgen receptor and NF-κB signaling
Source: Research Square preprint supplement (doi:10.21203/rs.3.rs-8252467/v1), 2026-01-13
Supplement: Supplementary file 1 [file 24a7af51d93f8117f50e88a6.docx]

Manuscript title, "**Therapeutic potential of Diosmin against benign prostatic hyperplasia via regulation of androgen receptor and NF-κB signaling**".

Abul Vafa1, Rupali Ghosh1, Nishat Afroz1,2, Syed Abuzar Raza Rizvi1, Zaid Siddiqui1, Saima Wajid1,*

Ref: Submission ID 72f406b7-c571-4e9f-89ad-9b751977d492

**Full-length Western blot images corresponding to Figure 4A, showing β-actin AR, NF-κB p65, and COX-2 bands.**

Western blot showing detection of β-actin (~42 kDa) used as a loading control for the corresponding experiments. (The sequence is from left to right G1, G2, G3, G4, then G5).


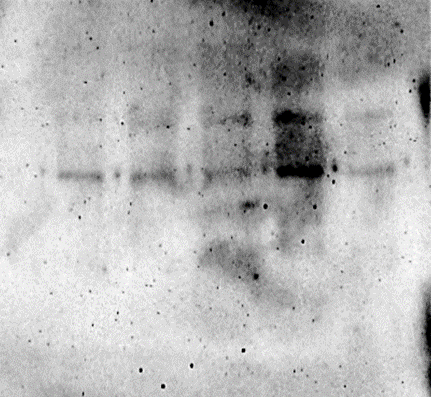


**~**40 kDa

Blot 1

β-Actin


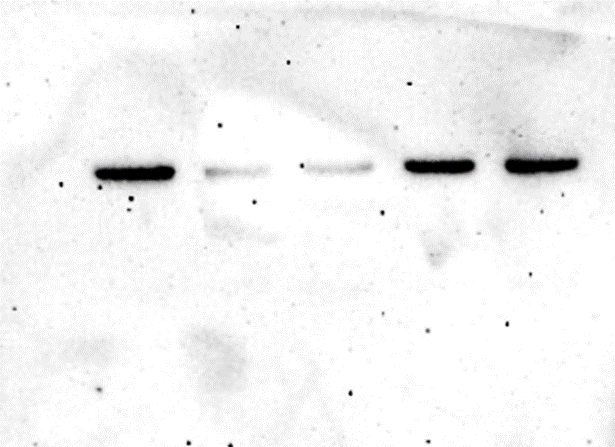


**~**40 kDa

Blot 2

G1

G2

G3

G4

G5

G1

G2

G3

G4

G5


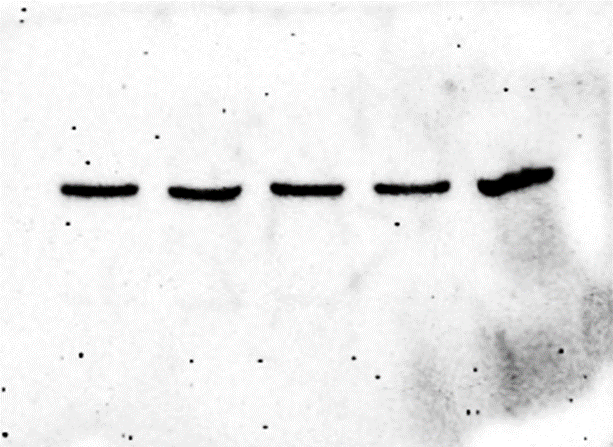


**~**40 kDa

Blot 3

presented in main figure

G1

G2

G3

G4

G5

Western blot showing detection of Androgen Receptor (AR, ~110 kDa) corresponding to the cropped blot presented in the main figure. (The sequence is from left to right G1, G2, G3, G4, then G5).

G1

G2

G3

G4

G5


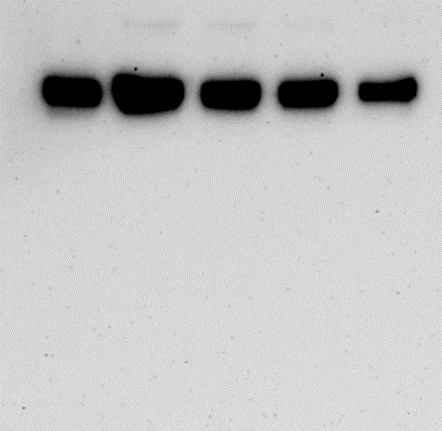


**~**110 kDa

Blot 1

Main blot

AR


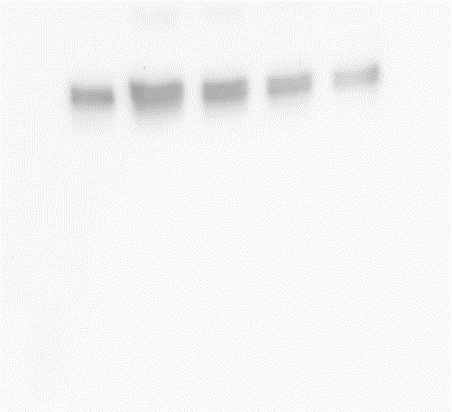


Blot 2

High contrast blot

**~**110 kDa

Western blot showing detection of NF-κB p65 (~65 kDa) corresponding to the cropped blot presented in the main figure. The sequence is from left to right G1, G2, G3, G4, then G5).

NF-κB

G1

G2

G3

G4

G5


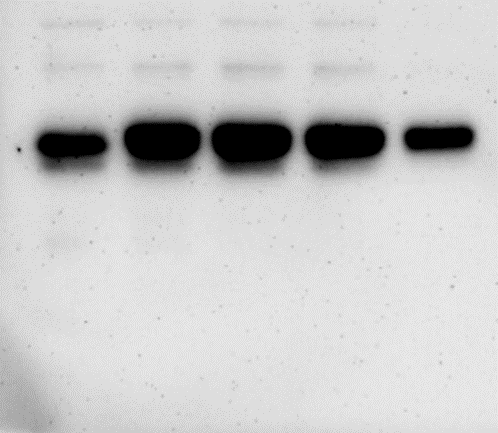


**~**62 kDa

Blot 1

Main blot


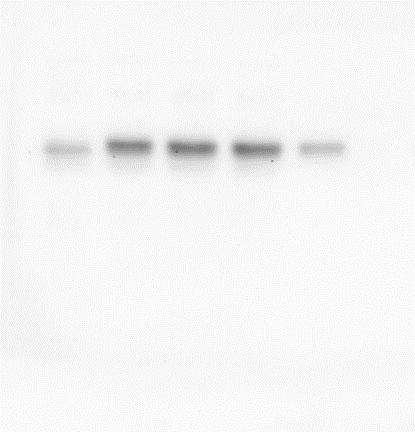


**~**62 kDa

Blot 2

High contrast

Western blot showing detection of **COX-2 (~72 kDa)** corresponding to the cropped blot presented in the main figure.The sequence is from left to right G1, G2, G3, G4, then G5).

G1

G2

G3

G4

G5


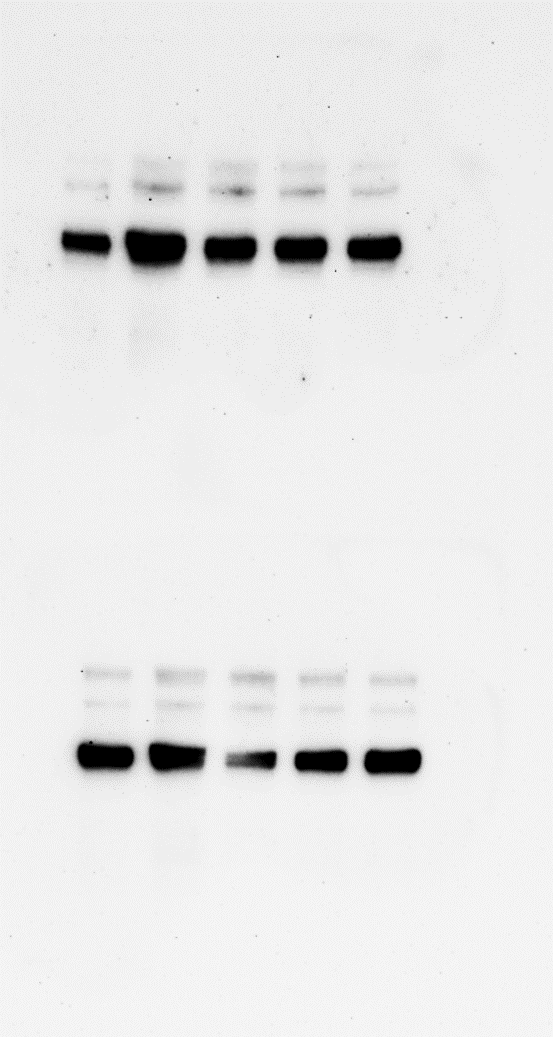


**~70** kDa

Blot 1

Main blot

COX-2


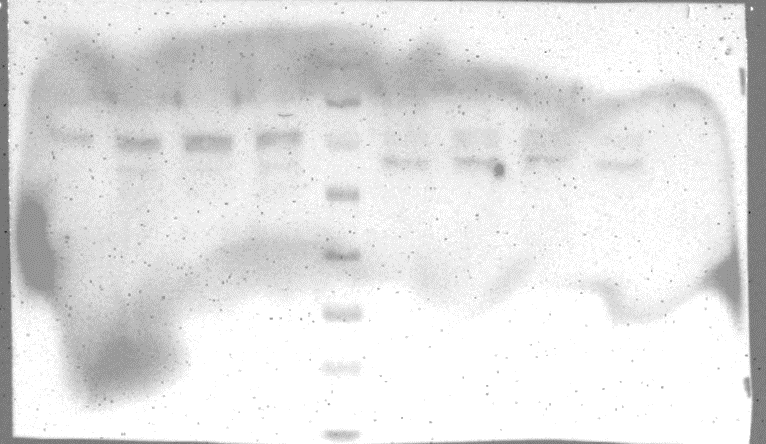


**~70** kDa

Blot 2
